# Supplementary material
Source: PubMed Central journal article supplement (PMC6482435)
Supplement: bi8b01208_si_001.pdf [file bi8b01208_si_001.pdf]

## Rapid Deorphanization of Human Olfactory Receptors in Yeast

Emily A. Yasi<sup>1</sup>, Sara L. Eisen<sup>1</sup>, Hanfei Wang<sup>1</sup>, Widiанти Sugianto<sup>1</sup>, Anita R. Minniefield<sup>1</sup>, Kaitlyn A. Hoover<sup>1</sup>, Paul J. Branham<sup>1</sup>, Pamela Peralta-Yahya<sup>1,2\*</sup>

### Table of Contents

|                                                                                                     | <b>Page</b> |
|-----------------------------------------------------------------------------------------------------|-------------|
| <b>Materials and Methods</b>                                                                        | S2          |
| <b>Table S1.</b> Sequence identity of olfactory receptors expressed in the colon                    | S2          |
| <b>Table S2.</b> Table of primers                                                                   | S2          |
| <b>Table S3.</b> Table of plasmids                                                                  | S3          |
| <b>Table S4.</b> Table of strains                                                                   | S4          |
| <b>Table S5.</b> Table of chemicals in the chemical panel                                           | S4          |
| <b>Table S6.</b> Abbreviations and chemical descriptors used in the principle component analysis    | S6          |
| <b>Table S7.</b> Chemical space coordinates of the screened chemicals                               | S7          |
| <b>Table S8.</b> R <sup>2</sup> values for dose response fits.                                      | S7          |
| <b>Figure S1.</b> Dose response curve of OR2W3 with nerol                                           | S8          |
| <b>Figure S2.</b> Dose response curves of colon ORs with chemical hits (false positives).           | S8          |
| <b>Figure S3.</b> Dose response curves of OR2L13 and OR51B5 with validated chemicals                | S9          |
| <b>Figure S4.</b> Chemical toxicity to yeast-based OR sensor                                        | S9          |
| <b>Figure S5.</b> Changes in olfactory receptor gene expression levels in the presence of chemicals | S10         |
| <b>Figure S6.</b> Dose response curves of OR2A7 and OR2W3 with farnesol.                            | S10         |
| <b>Figure S7.</b> Eigenvalues for principle component determination                                 | S11         |
| <b>Sequences</b>                                                                                    | S11         |
| <b>References</b>                                                                                   | S14         |

**Materials.** Tert-butylbenzene (B90602) and 3-phenylbutyraldehyde (289027) were purchased from Sigma-Aldrich. Nonanoic acid (N0288) and nerol (N0077) were purchased from TCI Chemicals. Supplier information for the chemical panels can be found in **Table S5**.

**Chemical toxicity to yeast-based OR sensor.** Overnight cultures of PPY1802, PPY1804, PPY1806, and PPY1807 were diluted to an OD<sub>600</sub> = 1 in 5 mL of SD(HL<sup>-</sup>). Cultures were incubated for 4 hours at 30°C, 250 rpm with varying chemical concentrations with a final DMSO concentration of 1%. OD<sub>600</sub> was measured after incubation. The experiments were run in triplicate.

**mRNA Quantification.** Following the OR biosensing protocol, between 2 x 10<sup>7</sup> and 5 x 10<sup>7</sup> cells were pelleted and total RNA was extracted using Qiagen RNeasy Mini Kit. RNA concentration was measured using a Nanodrop Lite spectrophotometer and stored at -80°C. Reverse transcription was executed using 700 µg of total RNA using the QuantiTect Reverse Transcription kit (Qiagen). Quantitative PCR reactions were set up using the QuantiTect SYBR Green PCR kit (Qiagen) using cDNA from 42 ng of mRNA and read using a StepOnePlus Real-Time PCR system (Applied Biosciences). Reactions were set up as technical triplicates using primers EY270/EY271 for OR10S1, EY272/EY273 for OR2A7, EY274/EY275 for OR2T4, and ACT-F/ACT-R for actin. OR expression were normalized to the housekeeping gene, ACT1, that encodes actin and relative expression of chemical versus no chemical (DMSO) was compared using the comparative C<sub>T</sub> method (Livak and Schmittgen, 2001) using the equations below.

$$\Delta C_{T\_Sample} = avgC_{T\_Sample} - avgC_{T\_Actin}$$

$$\Delta\Delta C_T = \Delta C_T - \Delta C_{T\_DMSO}$$

$$2^{-\Delta\Delta C_T} = \text{Mean relative expression of gene of interest compared to DMSO control}$$

$$2^{-(\Delta\Delta C_T \pm StDev)} = \text{Range of fold change in expression relative to DMSO control}$$

$$StDev = \text{standard deviation of } \Delta C_{T\_Sample}$$

**Table S1.** Sequence identity of ectopically expressed olfactory receptors in the colon

|        | OR2A7  | OR2T4  | OR2A42 | OR2W3  | OR51B5 | OR2L13 | OR10S1 |
|--------|--------|--------|--------|--------|--------|--------|--------|
| OR2A7  |        |        |        |        |        |        |        |
| OR2T4  | 39.90% |        |        |        |        |        |        |
| OR2A42 | 71.30% | 44.00% |        |        |        |        |        |
| OR2W3  | 42.70% | 41.60% | 46.90% |        |        |        |        |
| OR51B5 | 31.80% | 28.80% | 32.20% | 27.60% |        |        |        |
| OR2L13 | 39.50% | 49.20% | 42.20% | 39.30% | 26.20% |        |        |
| OR10S1 | 39.60% | 36.40% | 41.70% | 41.60% | 28.20% | 40.30% |        |

**Table S2.** Table of primers

| Name  | Sequence              |
|-------|-----------------------|
| EY46  | ACTTCTTGCTCATTAGAAAG  |
| HW12  | CTTTTCGGTTAGAGCGGATC  |
| EY270 | CTGTCAGCCGTTACATTATCC |

|       |                                                |
|-------|------------------------------------------------|
| EY271 | CCACAATACAGCAGACGAAAG                          |
| EY272 | CCGTGAAGTTCAGCGTAAG                            |
| EY273 | TTCAGCATCGGGTTAAACAG                           |
| EY274 | TTCAGACAGAGCAAGCACC                            |
| EY275 | ACGAAAATGACGACACACAG                           |
| ACT-F | TTCTGAGGTTGCTGCTTTGG                           |
| ACT-R | ACCGACGATAGATGGGAAGAC                          |
| HW1   | GCAATCTAATCTAAGTTTTAATTACAAAGGATCC             |
| HW4   | AGAATGAGATTCTTGTCCC                            |
| HW7   | TTCCTTGCCTAGTTCTCTTACC                         |
| HW8   | TTCCATTGCCTTTTGAAGGC                           |
| HW9   | GGTACCAATTCTATGGGTGGTG                         |
| PB89  | TTCCTTCAGGAAGCTGAAGATACC                       |
| PB116 | CGGCGGCGGGCTA                                  |
| PB118 | CAGTGCACGTTCAACACCC                            |
| HW15  | AGGAGGGCTTTGGGCAAGGAATCTCATTCTGTGAGCAAGGGCGAGG |
| HW18  | TTGTTGGGTAAGAGAGAACTAGGCAAGGAAGTGAGCAAGGGCGAGG |
| HW19  | GTTGAACCAGCCTTCCAAAAGGCAATGGAAGTGAGCAAGGGCGAGG |
| HW20  | CATTTGTTACCCATAGAAATTGGTACCGTGAGCAAGGGCGAGG    |
| PB88  | GTGTTCCGGTATCTTCAGCTTCTGAAGGAAGTGAGCAAGGGCGAG  |
| PB115 | AGCACCGCAGGTAGCCCGCCGCGGTGAGCAAGGGCGAGG        |
| PB117 | GTTCTGGGTGTTGAACGTGCACTGGTGAGCAAGGGCGAGG       |

**Table S3.** Table of Plasmids.

| Number  | Name   | Description                                            | Source                  |
|---------|--------|--------------------------------------------------------|-------------------------|
| PPY111  | pKM111 | pESC-His3-P <sub>TEF1</sub> -P <sub>ADH1</sub>         | Mukherjee et al. (2015) |
| PPY586  | pKM586 | pRS415- P <sub>FIG1</sub> -eGFP-Leu2                   | Mukherjee et al. (2015) |
| PPY1658 | pHW3   | pESC-HIS3-P <sub>TEF1</sub> -OR2A42- P <sub>ADH1</sub> | This study              |
| PPY1661 | pHW6   | pESC-HIS3-P <sub>TEF1</sub> -OR2W3- P <sub>ADH1</sub>  | This study              |
| PPY1663 | pHW7   | pESC-HIS3-P <sub>TEF1</sub> -OR2T4- P <sub>ADH1</sub>  | This study              |
| PPY1715 | pHW18  | pESC-HIS3-P <sub>TEF1</sub> -OR51B5- P <sub>ADH1</sub> | This study              |
| PPY1795 | pPB8   | pESC-HIS3-P <sub>TEF1</sub> -OR2L13- P <sub>ADH1</sub> | This study              |
| PPY1717 | pHW20  | pESC-HIS3-P <sub>TEF1</sub> -OR10S1- P <sub>ADH1</sub> | This study              |
| PPY1718 | pHW21  | pESC-HIS3-P <sub>TEF1</sub> -OR2A7- P <sub>ADH1</sub>  | This study              |
| PPY1719 | pHW22  | pESC-HIS3-P <sub>TEF1</sub> -OR2A42-GFP                | This study              |
| PPY1720 | pHW23  | pESC-HIS3-P <sub>TEF1</sub> -OR51B5-GFP                | This study              |

|         |       |                                         |            |
|---------|-------|-----------------------------------------|------------|
| PPY1734 | pHW30 | pESC-HIS3-P <sub>TEF1</sub> -OR2T4-GFP  | This study |
| PPY1737 | pHW33 | pESC-HIS3-P <sub>TEF1</sub> -OR2W3-GFP  | This study |
| PPY1947 | pPB59 | pESC-HIS3-P <sub>TEF1</sub> -OR2A7-GFP  | This study |
| PPY1948 | pPB60 | pESC-HIS3-P <sub>TEF1</sub> -OR10S1-GFP | This study |
| PPY1930 | pPB54 | pESC-HIS3-P <sub>TEF1</sub> -OR2L13-GFP | This study |

**Table S4.** Table of Strains.

| Strain Number | Description                                                                                                                   | Source                  |
|---------------|-------------------------------------------------------------------------------------------------------------------------------|-------------------------|
| PPY140        | <i>S. cerevisiae</i> MATa ade2-1 ura3-1 his3-11 trp1-1 leu2-3 leu2-112 can1-100 $\Delta far1$ , $\Delta sst2$ , $\Delta ste2$ | Mukherjee et al. (2015) |
| PPY1800       | PPY140 carrying pKM111 and pKM586                                                                                             | This study              |
| PPY1801       | PPY140 carrying pHW3 and pKM586                                                                                               | This study              |
| PPY1802       | PPY140 carrying pHW6 and pKM586                                                                                               | This study              |
| PPY1803       | PPY140 carrying pHW7 and pKM586                                                                                               | This study              |
| PPY1804       | PPY140 carrying pHW18 and pKM586                                                                                              | This study              |
| PPY1805       | PPY140 carrying pPB8 and pKM586                                                                                               | This study              |
| PPY1806       | PPY140 carrying pHW20 and pKM586                                                                                              | This study              |
| PPY1807       | PPY140 carrying pHW21 and pKM586                                                                                              | This study              |
| PPY1949       | PPY140 carrying pHW22                                                                                                         | This study              |
| PPY1950       | PPY140 carrying pHW23                                                                                                         | This study              |
| PPY1951       | PPY140 carrying pHW30                                                                                                         | This study              |
| PPY1952       | PPY140 carrying pHW33                                                                                                         | This study              |
| PPY1953       | PPY140 carrying pPB59                                                                                                         | This study              |
| PPY1954       | PPY140 carrying pPB60                                                                                                         | This study              |
| PPY1955       | PPY140 carrying pPB54                                                                                                         | This study              |

**Table S5.** Table of chemicals in the chemical panel

| Chemical               | CAS #     | Supplier      | Catalog # |
|------------------------|-----------|---------------|-----------|
| (-)-limonene           | 5989-54-8 | TCI Chemicals | L0132     |
| (+)-carvone            | 6485-40-1 | TCI Chemicals | C0703     |
| (+)-menthol            | 2216-51-5 | TCI Chemicals | M0826     |
| 1,2,3-trimethylbenzene | 526-73-8  | TCI Chemicals | T0468     |
| 1-butanol              | 71-36-3   | TCI Chemicals | B0944     |
| 1-butoxy-2-propanol    | 5131-66-8 | TCI Chemicals | B0864     |
| 1-dodecanol            | 112-53-8  | Alfa Aesar    | A12228    |
| 1-octanol              | 111-87-5  | TCI Chemicals | O0036     |
| 1-propanol             | 71-23-8   | TCI Chemicals | P0491     |

|                      |            |               |          |
|----------------------|------------|---------------|----------|
| 2,3-heptadione       | 96-04-8    | TCI Chemicals | H0422    |
| 2,5-dimethylpyrazine | 123-32-0   | TCI Chemicals | D1526    |
| 2-methyl-1-butanol   | 137-32-6   | TCI Chemicals | M0175    |
| 3-hexanone           | 589-38-8   | TCI Chemicals | H0115    |
| 3-pentanol           | 584-02-1   | TCI Chemicals | P0057    |
| acetic acid          | 64-19-7    | VWR           | BDH3092  |
| alpha-pinene         | 80-56-8    | Sigma-Aldrich | 305715   |
| anisaldehyde         | 123-11-5   | TCI Chemicals | A1674    |
| beta-pinene          | 127-91-3   | Sigma-Aldrich | CRM40433 |
| butyric acid         | 107-92-6   | TCI Chemicals | B0754    |
| coumarin             | 91-64-5    | TCI Chemicals | C0395    |
| ethyl decanoate      | 110-38-3   | TCI Chemicals | D0022    |
| ethyl laurate        | 106-33-2   | TCI Chemicals | L0013    |
| ethyl myristate      | 124-06-1   | TCI Chemicals | M0479    |
| ethyl octanoate      | 106-32-1   | TCI Chemicals | O0030    |
| ethyl palmitate      | 628-97-7   | Alfa Aesar    | A15694   |
| ethyl stearate       | 111-61-5   | TCI Chemicals | S0079    |
| eugenol              | 97-53-0    | Alfa Aesar    | A14332   |
| farnesol             | 4602-84-0  | TCI Chemicals | T0608    |
| geraniol             | 106-24-1   | TCI Chemicals | G0027    |
| heptanoic acid       | 111-14-8   | Alfa Aesar    | A17704   |
| hexanoic acid        | 142-62-1   | Alfa Aesar    | A13789   |
| isovaleric acid      | 503-74-2   | TCI Chemicals | M0182    |
| lactic acid          | 50-21-5    | Alfa Aesar    | 36415    |
| lauric acid          | 143-07-7   | TCI Chemicals | L0011    |
| lilial               | 80-54-6    | TCI Chemicals | B1145    |
| linalool             | 78-70-6    | TCI Chemicals | L0048    |
| lyral                | 31906-04-4 | Sigma-Aldrich | 95594    |
| melatonin            | 73-31-4    | Sigma-Aldrich | M5250    |
| methyl decanoate     | 110-42-9   | Alfa Aesar    | A15658   |
| methyl laurate       | 111-82-0   | Alfa Aesar    | A12492   |
| methyl myristate     | 124-10-7   | Alfa Aesar    | A10257   |
| methyl octanoate     | 111-11-5   | Alfa Aesar    | A10991   |
| methyl palmitate     | 112-39-0   | TCI Chemicals | S0311    |
| methyl stearate      | 112-61-8   | TCI Chemicals | S0312    |
| m-xylene             | 108-38-3   | Sigma-Aldrich | 95670    |
| myristic acid        | 544-63-8   | TCI Chemicals | M0476    |
| nonanal              | 124-19-6   | TCI Chemicals | N0296    |
| octanal              | 124-13-0   | Alfa Aesar    | A10901   |

|                    |            |               |        |
|--------------------|------------|---------------|--------|
| octanoic acid      | 124-07-2   | Alfa Aesar    | A11149 |
| palmitic acid      | 57-10-3    | TCI Chemicals | P0002  |
| p-cymene           | 99-87-6    | TCI Chemicals | C0513  |
| pentadecanoic acid | 1002-84-2  | Alfa Aesar    | A14664 |
| propionic acid     | 79-09-4    | TCI Chemicals | P05000 |
| sotolon            | 28664-35-9 | TCI Chemicals | D1851  |
| stearic acid       | 57-11-4    | TCI Chemicals | S0163  |
| undecanal          | 112-44-7   | TCI Chemicals | U0009  |
| vanillin           | 121-33-5   | Alfa Aesar    | A11169 |

**Table S6.** Abbreviations and Chemical Descriptors for PCA Analysis

| <b>Descriptors</b>             | <b>Abbreviations</b> |
|--------------------------------|----------------------|
| Molecular Weight               | MW                   |
| Carbon atom count              | CAC                  |
| Hydrogen atom count            | HAC                  |
| Oxygen atom count              | OAC                  |
| Nitrogen atom count            | NAC                  |
| Hydrogen-bond donors           | HBD                  |
| Hydrogen-bond acceptor         | HBA                  |
| Rotatable bonds                | RB                   |
| Stereocenter count             | SC                   |
| Topological polar surface area | TPSA                 |
| Number of rings                | NOR                  |
| Aromatic ring count            | ARC                  |
| Ring system count              | RSC                  |
| Size of largest ring           | SLR                  |
| Van der Waals surface area     | VSA                  |
| Amine                          | -                    |
| Alcohol                        | -                    |
| Ether                          | -                    |
| Aldehyde                       | -                    |
| Ketone                         | -                    |
| Carboxylic Acid                | -                    |
| Ester                          | -                    |
| Amide                          | -                    |

**Table S7.** Chemical space coordinates of the screened chemicals

| Chemical Space | PC1<br>(28%<br>variance) | PC2<br>(19%<br>variance) | PC3<br>(16%<br>variance) | Members | Population (%) |
|----------------|--------------------------|--------------------------|--------------------------|---------|----------------|
| 1              | -                        | -                        | -                        | 9       | 15.8           |
| 2              | +                        | -                        | -                        | 8       | 14.0           |
| 3              | -                        | -                        | +                        | 6       | 10.5           |
| 4              | +                        | -                        | +                        | 8       | 14.0           |
| 5              | +                        | +                        | -                        | 2       | 3.5            |
| 6              | -                        | +                        | -                        | 13      | 22.8           |
| 7              | +                        | +                        | +                        | 6       | 10.5           |
| 8              | -                        | +                        | +                        | 5       | 8.8            |
|                |                          |                          | <b>Total:</b>            | 57      | 100            |

**Table S8.** R<sup>2</sup> values for dose response fits

| Figure | OR     | Chemical          | R <sup>2</sup> |
|--------|--------|-------------------|----------------|
| 3A, 4A | OR2A7  | $\alpha$ -pinene  | 0.98946        |
| 3A, 4B | OR2T4  | $\alpha$ -pinene  | 0.99269        |
| 3B, 4C | OR2A7  | lilial            | 0.97004        |
| 3B, 4D | OR2T4  | lilial            | 0.99854        |
| 3B     | OR10S1 | lilial            | 0.99623        |
| 3C     | OR51B5 | farnesol          | 0.99585        |
| 3D     | OR2T4  | undecanal         | 0.90762        |
| 3D     | OR10S1 | nonanal           | 0.99651        |
| 4A     | OR2A7  | $\beta$ -pinene   | 0.99659        |
| 4C     | OR2A7  | tert-butylbenzene | 0.99853        |

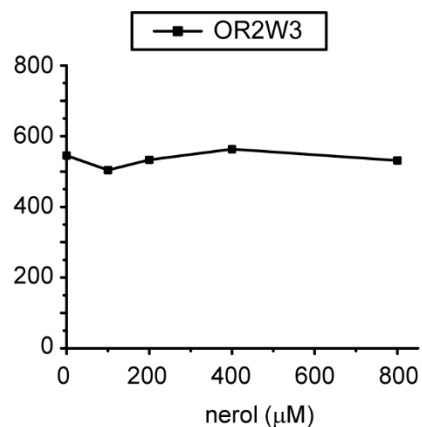

**FIGURE S1. Dose response curve of OR2W3 with nerol.**

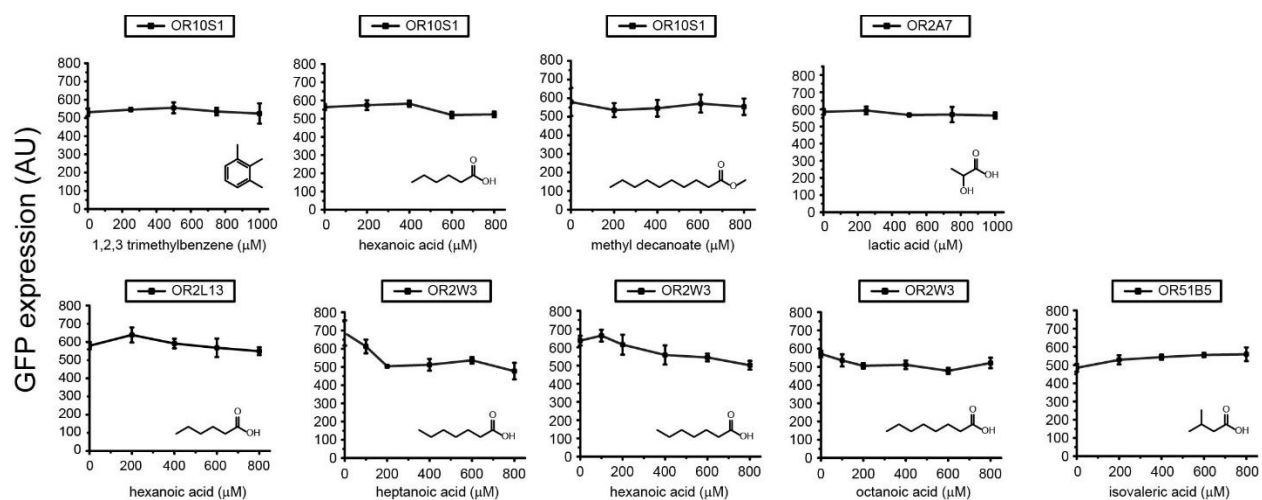

**Figure S2. Dose response curves of colon ORs with chemical hits (false positives).**  
Chemicals shown above did not elicit a statistically significant increase in GFP expression.



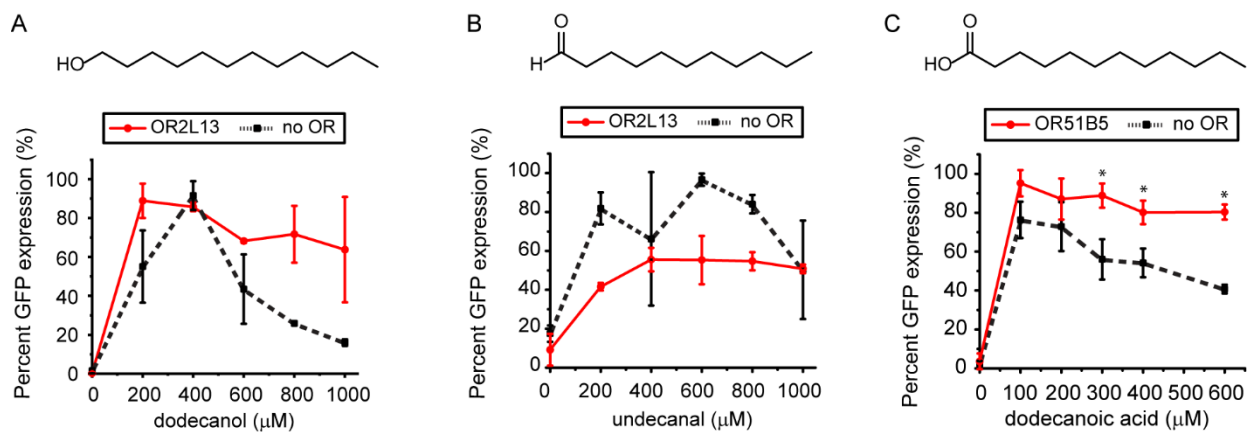

**Figure S3. Dose response curves of OR2L13 and OR51B5 with validated chemicals. A.** OR2L13 with dodecanol. **B.** OR2L13 with undecanal. **C.** OR51B5 with dodecanoic acid.

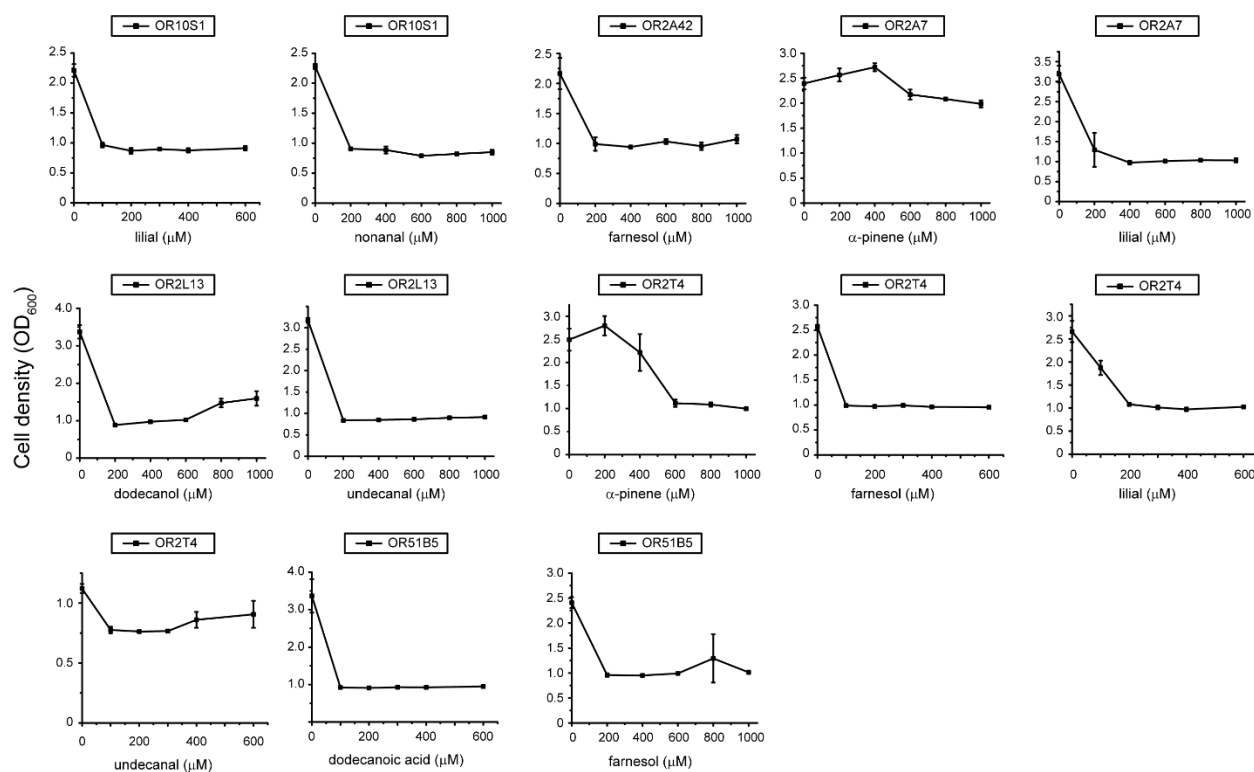

**FIGURE S4. Chemical toxicity to yeast-based OR sensor.** Yeast cell density was measured after the 4 hour incubation step in the OR chemical sensing protocol. The no chemical data point has 1% DMSO. While the yeast cells double in the absence of chemical, their cell density is static in the presence of chemical.

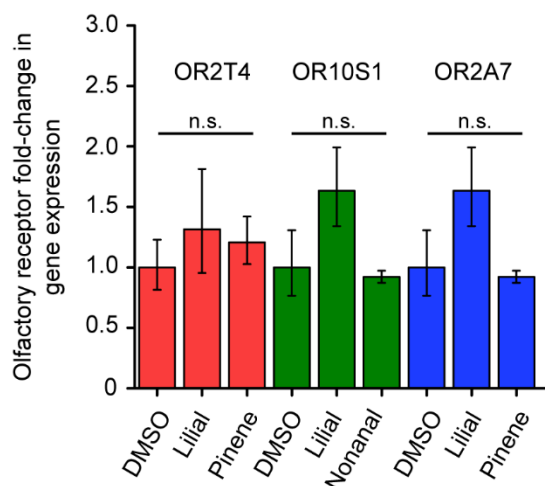

**FIGURE S5. Changes in olfactory receptor gene expression levels in the presence of chemicals.** Red bars: OR2T4. Green bars: OR10S1. Blue bars: OR2A7. The gene expression experiments were run 600  $\mu$ M lilial and nonanal, and 1000 $\mu$ M pinene. DMSO controls were compared to OR/chemical pairs for OR2T4, OR10S1, and OR2A7 and in all cases  $P > 0.05$ .

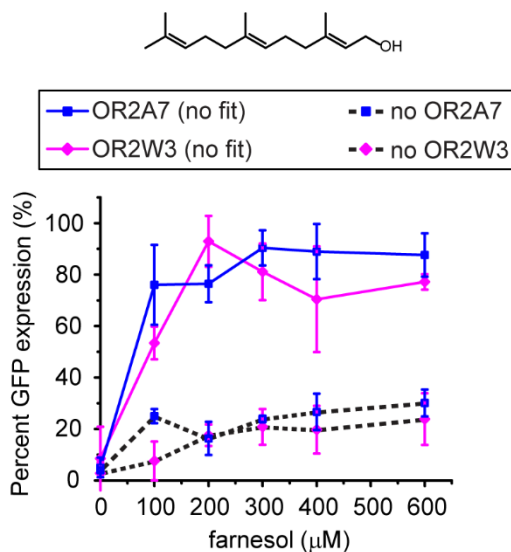

**FIGURE S6. Dose response curves of OR2A7 and OR2W3 with farnesol.**

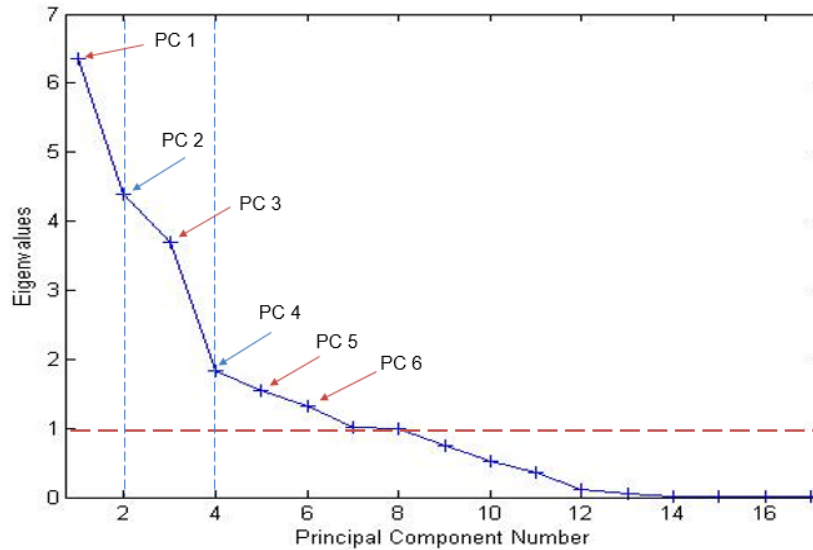

**Figure S7. Eigenvalues for principle component determination.** Two criteria to be considered in determining number of principle components are: 1) number of PCs with eigenvalues greater than one (red dashes and red arrows), 2) PCs located after bends or knees (blue dashes and blue arrow). Solo analysis resulted in six eigenvalues greater than one, thus six PCs (PCs 1 to 6) could be considered for the analysis. Two bends were also observed on the graph at PC2 and PC4, meaning that the PCs after the bends (PC3 and PC5) need to be included in the analysis. These criteria led us to include three PCs (PCs 1-3) in our analysis.

### Sequences

*Homo sapiens* OR2A42 (UniprotKB - Q8NGT9)

```

ATGGGTGAAAATCAAACATGGTTACCGAATTTCTACTACTAGGTTTCCTACTAGGTCCAAG
AATCCAAATGCTACTATTCGGTTTGTCTCCTTGTTCACATTTTCACCTTGTGGGTAACG
GTGCTATTTTGGGTTTGATTTCCTTGGATTCCAGATTGCATACCCCAATGTATTTCTTCCTAA
GTCATTTGGCTGTTGTTGATATTGCTTACACCAGAAACACCGTTCCACAAATGTTGGCTAAC
TTGTTGCACCCTGCCAAGCCTATTAGCTTCGCCGGATGCATGACCCAAACCTTCTTATGTTT
ATCCTTCGGTCATTCCGAATGTTTGTGTTGGTTTTGATGTCTTACGATAGATACGTTGCTA
TTTGTCCATCCATTGAGATACTCCGTTATTATGACTTGGAGAGTTTGTACTTTGGCTGTTA
CTTCTGGACTTGTGGTTCCTTGTGGCTTTGGCTCATGTTGTTTTGATTTTGAGATTGCCA
TTCTCCGGCCACATGAAATTAACCATTTCTTCTGTGAAATTTGTCCGTTTTGAGATTGGC
TTGTGCTGATACTTGGTTGAACCAAGTTGTTATTTTCGCTGCTTGTGTCTTCTCCTAGTTG
GTCCACCATCTTTGTTTTGGTTTCTTACTCTCATATTTTGGCTGCTATTTTGAGAATACAAT
CTGGCGAAGGCAGAAGAAAGGCTTTCTACTTGTCTTCTCATTGTGTGTTGTTGTTTTG
TTCTTCGGTTCTGCTATTATTATGTACATGGCTCCAAAGTCTAGACATCCAGAAGAACAACA
AAAGGTTTTCTTCTTGTCTACTCTTTCTTCAACCCAACTTTGAACCCATTGATTTACTCTTT
GAGAAACGGCGAAGTTAAGGGTGCTTTGAGGAGGGCTTTGGGCAAGGAATCTCATTCTTA
A

```

*Homo sapiens* OR2W3 (UniprotKB – Q7Z3T1)

```

ATGGATGGTACTAACGGTTCCACCCAAACCCACTTTATTCTATTGGGTTTCTCCGATAGACC
ACATTTGGAAGAATTTTGTTCGTTGTTATTTTGTGTTGCTTACTTGTGACCTTGGTTGGTAA
CACCACCATTATTTTGGTTTCCAGACTAGACCCACATTTGCATACCCCAATGTACTTCTTCT
TGGCTCATTGTCTTCTTGGATTTGTCTTTACCACCTCCTCCATTCCACAATTGTTGTACA

```

ACTTGAACGGTTGTGATAAGACCATTTCTACATGGGTTGTGCTATTCAATTGTTCTTGTTCTTGGGTTTGGGTGGTGTGAATGTTTGTGTTGGCTGTTATGGCTTACGATAGATGTGTTGCTATTTGTAAGCCATTGCATTACATGGTTATTATGAACCCAAGATTGTGTAGAGGTTTGGTTCTGTTACCTGGGGTTGTGGTGTGCTAACTCTTTGGCTATGTCTCCAGTCACTCTACGCTACCAAGATGTGGCCATCATGAAGTTGATCATTTCTTGAGAGAAATGCCAGCTTTGATTAGAATGGCTTGTGTTTCTACTGTTGCTATTGAAGGTAAGTGTGTTTTCGTTTTGGCTGTTGGTGTGTTCTAAGTCCATTGGTTTTCATTTTGTGCTTACTCTTACATTGTTAGAGCTGTTCTACAAATAGATCTGCTTCTGGTAGACAAAAGGCTTTCGGTACTTGTGTTTCTCATTGACTGTTGTTCTTTGTTCTACGGTAACATTATTTACATGTACATGCAACCAGGTGCTTCTTCTCAAGATCAAGGTATGTTTCTAATGCTATTCTACAACATTGTTACTCCATTGTTGAACCCCTAATCTACACTCTACGTAACCGTGAAGTCAAGGGTGCTTTGGGTAGATTGTTGTTGGGTAAAGAGAGAACTAGGCAAGGAATAA

*Homo sapiens* OR2T4 (UniprotKB - Q8NH00)

ATGGGTCTGTTTCAGACAGAGCAAGCACCCAATGGCTAACATTACCTGGATGGCTAACCCATACCGGTTGGAGCGATTTTCATTCTGCTGGGTCTGTTTCAGACAATCCAAGCATCCAGCTCTGCTGTGTGTCGTCATTTTCGTTGTTTTCTTGATGGCTTTGTCCGGTAACGCTGTCCTAATCTTGTGATTCATTGTGATGCTCATTGTCATACCCCAATGTACTTCTTCAATTTCCCAATTGTCCTTGTGGATATGGCTTACATTTCCGTTACCGTTCCAAAGATGTTGTTGGATCAAGTTATGGGTGTTACAAGATTTCCGCTCCAGAATGTGGTATGCAAATGTTCTTCTACGTTACCTTGGCTGGTTCGAGTTCTTTCTGTTGGCTACTATGGCTTACGATAGATACGTTGCTATTTGTATCCATTGAGATACCCAGTTTTGATGAACCATAGAGTTTGTGTTCTTGTCTCCGTTGTTGGTTCTTGGTTCCGTCGATGGTTTTACCTTCACCCCAATTACCATGACCTTCCATTGAGAGGTTCCAGAGAAATTCACCACTTCTTCTGTGAAGTTCAGCTGTTTTGAACTTGTCTGTTCCGATACTTCCTTGACGAAATTTTCATGTACTTGTGTTGTGTTTTGATGTTGTTGATTCCAGTTGTTATTATTTCTTCTTCTTACTTGTGATTTTGTGACTATTCATGGTATGAACTCTGCTGAAGGTAGAAGAAGGCTTTGCTACTTGTCTTCTCATTGACTGTTGTTATTTTGTCTACGGTGCTGCTATTTACACTTACATGTTGCCATCTTCTTACCATACTCCAGAGAAGGATATGATGGTTTCTGTTTCTACACTATTTTACTCCAGTTGTTAACCATTGATTTACTCTTTGCGTAACAAGGATGTTATGGGTGCTCTAAAGAAGATGTTGACTGTTGAACCAGCCTTCCAAAAGGCAATGGAATAA

*Homo sapiens* OR51B5 (UniprotKB - Q9H339)

ATGTCCAGCTCCGGCTCCTCCCATCCATTCTTGTGACCGGCTTCCCAGGTTTGGAGAAGCTCATCATTGGATTTCCGTTTTCTTCTTGTTCATGTACATTTCCATTTTGTTCGGTAACGGTACCCTACTACTACTAATTAAGGAAGATCATAACTTGCATGAGCCTATGATTTCTTCTTGGCTATGTTGGCTGCTACCGATTTGGGTTTGGCTTTGACCACCATGCCAACCGTTTTGGGTGTTTGTGGTTGGATCATAGAGAGATTGGTTCTGCCGCTGTTTCTCCCAAGCCTACTTCATTCATTCCTTGTCTTCTTGGAAATCCGGCATTTTGTTGGCTATGGCTTACGATCGTTTCATTGCTATTTGTAACCCATTGAGATACACCTCCGTTCTAACTAATACTCGTGTTGTTAAGATTGGCTTGGGTGTTTTGATGAGAGGTTTCGTTTCCGTTGTTCCACCAATTAGACCATTGACTTCTTCTTGACTGTCATTCCCATGTTTTGTCCCATGCTTTCTGTTTGCATCAAGATGTTATTAAGTTGGCTGTGCTGATACTACTTTCAACAGATTGTACCCAGCTGTTTTGGTTGTTTTCATTTTCGTTTTGATTACTTGATCATCTTCATTAGTTACGTCCTAATTTTGAAGACTGTTTTGTCCATTGCTTCCAGAGAAGAAAGAGCTAAGGCTTTGATTACTTGTGTTAGTCATATTTGTTGTGTTTTGGTTTTCTACGTTACTGTTATTGGTCTAAGTTTGTATTCATCGTTTCCGAAAACAGGTCCACATATTGTTTCAATTTGATTATGTCTACGTTACTTCTTATTCCTCCACTAATGAACCCAATTACTTACTCCGTTAAGACCAAGCAAATTCAAAACGCTATTTTGCATTTGTTCCACCACCCATAGAATTGGTACCTAA

*Homo sapiens* OR2L13 (UniprotKB - Q8N349)

ATGGAGAAGTGGAAATCATACATCAAACGACTTCATCCTTCTGGGTCTGTTACCTCCTAATCA GACCGGTATCTTCTGCTCTGTCTGATCATTCTGATCTTCTTCTGGCAAGCGTTGGTAATA

GCGCAATGATTCATCTGATTCACGTTGATCCGCGTCTGCATACCCCGATGTATTTCTGCT  
GAGCCAGCTGAGCCTGATGGATCTGATGTATATTAGTACCACCGTTCCGAAGATGGCATAT  
AATTTCTTAAGTGGTCAGAAGGGCATCAGTTTCTTAGGTTGTGGTGTTCAAAGTTTCTTCTT  
CTTAACAATGGCCTGTAGTGAAGGTCTGTTACTCACCTCAATGGCCTACGATCGTTATTTAG  
CAATTTGTCATTCATTATATTATCCTATTAGAATGTCAAAGATGATGTGCGTTAAGATGATTG  
GTGGTTCTTGGACATTAGGTTCAATTAACAGTTTAGCACATACAGTGTTTCGCATTACATATT  
CCGTATTGTAGAAGTAGAGCAATTGATCATTCTTCTGTGACGTTCTGCTATGTTATTATTA  
GCTTGTACCGATACCTGGGTTTACGAATATATGGTGTTCGTTAGTACCAGTCTGTTCTTGTCT  
GTTCCCATTCATTGGTATTACCAGTAGTTGTGGTCGTGTTCTGTTTCGCAGTTTATCACATGC  
ATAGCAAGGAAGGCAGAAAGAAGGCATTCACTACTATTAGCACCCATCTGACCGTTGTTAT  
CTTCTATTACGCACCTTTTCGTTTACACCTATCTGCGTCCTCGTAACCTGCGTAGTCCGGCA  
GAAGATAAGATTCTGGCAGTGTTCTACACCATTCTGACCCCGATGCTGAACCCGATTATTTA  
TAGCCTGCGTAATAAAGAAGTTCTGGGTGCAATGCGTCGTGTGTTTCGGTATCTTCAGCTTC  
CTGAAGGAATAA

*Homo sapiens* OR10S1 (UniprotKB - Q8NGN2)

ATGACCAGTCGTAGTGTGGTGAAGATGACCATGACCACCGAAAATCCGAATCAGACAG  
TTGTTAGCCATTTCTTCTTAGAAGGTTTACGTTATACAGCAAAGCATAGTAGTTTATTCTTCT  
TATTATTCTTATTAATTTACAGTATTACAGTTGCAGGTAACCTTATTAATTTTATTAACCGTTGG  
TAGTGATAGCCATTTAAGTTTACCGATGTATCATTCTTAGGTCATTTAAGTTTCTTAGACGC  
CTGTTTAAGTACCGTTACAGTTCCGAAGGTTATGGCAGGTTTATTAACCTTAGACGGTAAAG  
TTATTAGTTTTCGAAGGTTGTGCAGTTCAGTTATATTGTTTCCACTTCTTAGCAAGTACAGAGT  
GTTTCTTATATACAGTTATGGCATAACGATCGTTATTTAGCAATCTGTCAGCCGTTACATTATC  
CGGTTGCCATGAATCGTCGTATGTGTGCCGAAATGGCAGGTATTACCTGGGCAATTGGTG  
CAACCCACGCAGCAATTCATACCAGCCTGACCTTTTCGTCTGCTGTATTGTGGTCCGTGTCA  
TATTGCATATTTCTTCTGTGATATTCCGCCGGTTCTGAAACTGGCCTGTACCGATAACACCA  
TTAACGAACTGGTTATGTTAGCAAGTATTGGTATTGTTGCAGCAGGTTGTCTGATTCTGATT  
GTTATTAGTTATATTTTTCATTGTTGCAGCAGTTTACGTATTTCGTACAGCACAGGGTCGTCA  
GCGTGCATTCAGTCCGTGTACAGCACAAATTAACAGGTGTTTTATTATATTACGTTCCGCCG  
GTTTGCATTTATTTACAACCGCGTAGCAGTGAAGCAGGTGCCGGTGCACCGGCAGTTTTCT  
ATACCATTGTTACACCGATGCTGAATCCGTTTATTTATACATTACGTAATAAGGAGGTTAAA  
CACGCATTACAACGTTTACTGTGTAGTAGTTTTCTGTAAGCACCAGGTAGCCCGCCCGC  
CGTAA

*Homo sapiens* OR2A7 (UniprotKB - Q96R45)

ATGGGTGACAACATTACCAGCATTACCGAATTTCTGCTGCTGGGTTTTCTGTTGGTCCAC  
GCATCCAGATGCTGCTGTTTGGTCTGTTTCAGCCTGTTCTACGTATTTACACTGCTGGGTAA  
CGGTACCATTTTAGGTTTAAATTAGCTTAGATAGCCGTTTACACGCACCTATGTACTTCTTCTT  
AAGCCATTTAGCAGTTGTTGATATTGCATACGCTTGCAACACAGTTCCTCGTATGTTGGTTA  
ACTTATTACATCCGGCTAAACCTATTAGCTTCGCAGGTTCGTATGATGCAAACCTTCTTATTT  
AGCACCTTCGCAGTTACCGAGTGTATTATTAGTTGTTATGAGCTACGATTTATACGTTGC  
AATTTGCCATCCATTACGTTACTTAGCAATTATGACCTGGCGTGTTTGTATTACCTTAGCAG  
TTACAAGCTGGACAACAGGTGTTCTGTTAAGTCTGATTCACCTAGTTTTATTATTACCTTTAC  
CTTTCTGTCGTCCTCAAAGATTTATCATTCTTCTGTGAAATTTTAGCAGTTTTAAAGTTAG  
CCTGTGCAGACACACATTAACGAAAACATGGTTTTAGCAGGTGCAATTAGCGGTTTAGT  
TGGTCTTTAAGTACCATTGTTGTTAGCTACATGTGTATTCTGTGTGCAATTTTACAAATTCA  
AAGCCGTGAAGTTCAGCGTAAGGCATTCTGCACCTGTTTCAGCCACCTGTGTGTTATTGGT  
TTATTCTACGGTACAGCAATTATTATGTACGTTGGTCCGCGTTACGGTAACCCTAAGGAACA  
AAAGAAGTACTTATTATTATTCATAGCCTGTTTAAACCCGATGCTGAACCCGCTGATTTGTA  
GCCTGCGTAACAGCGAAGTTAAGAACCCTGAAGCGCGTTCTGGGTGTTGAACGTGCAC  
TGTA

## REFERENCES

Mukherjee, K., Bhattacharyya, S. & Peralta-Yahya, P. (2015) GPCR-Based Chemical Biosensors for Medium-Chain Fatty Acids. *ACS Synthetic Biology* 4, 1261-1269.

Livak, K. J. & Schmittgen, T. D. (2001) Analysis of relative gene expression data using real-time quantitative PCR and the 2<sup>(-Delta Delta C(T))</sup> Method. *Methods* 25, 402-408.
